# Supplementary material for: An epigenetic switch ensures transposon repression upon dynamic loss of DNA methylation in embryonic stem cells
Source: eLife journal article supplement (doi:10.7554/elife.11418), 2016-01-27

A

## Category A with spatial partition of H3K9me3 and H3K27me3

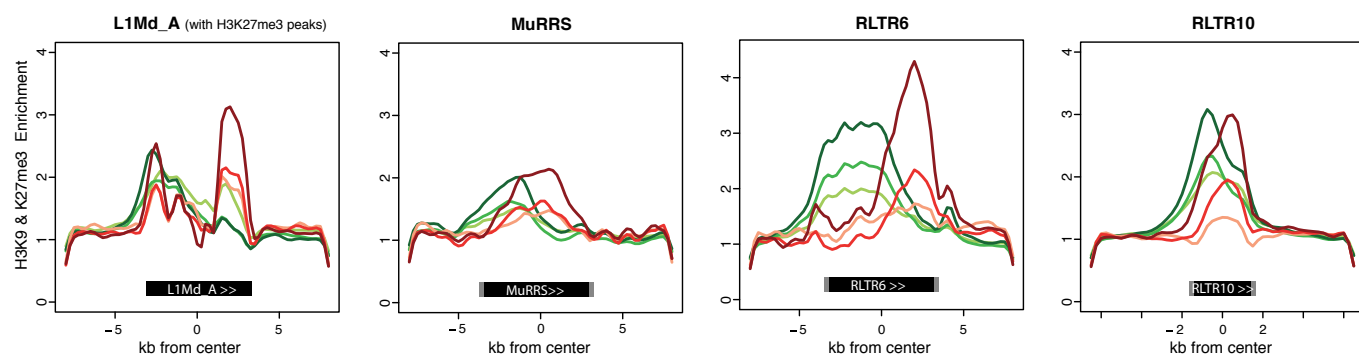

## Category A with 5' overlap of H3K9me3 and H3K27me3

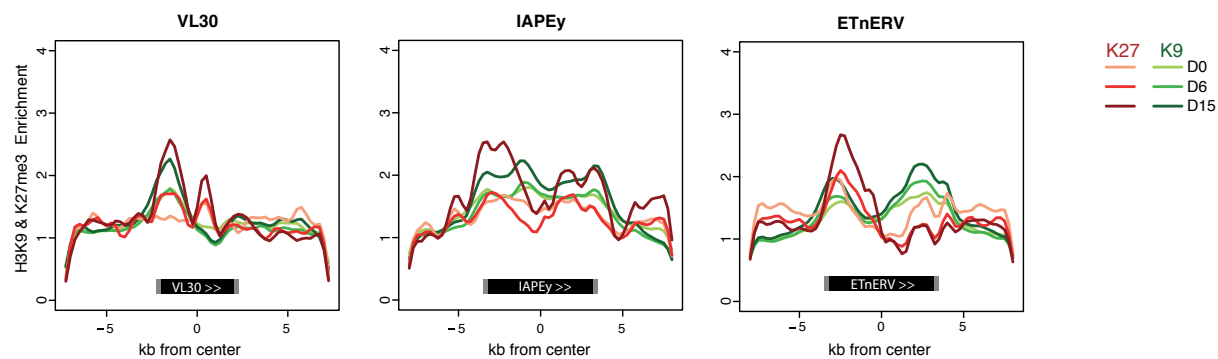

## Category B

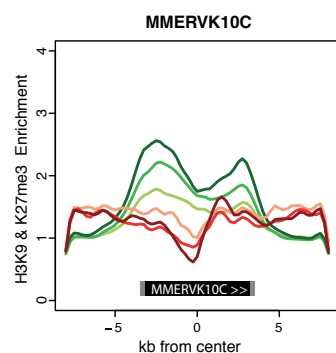

B

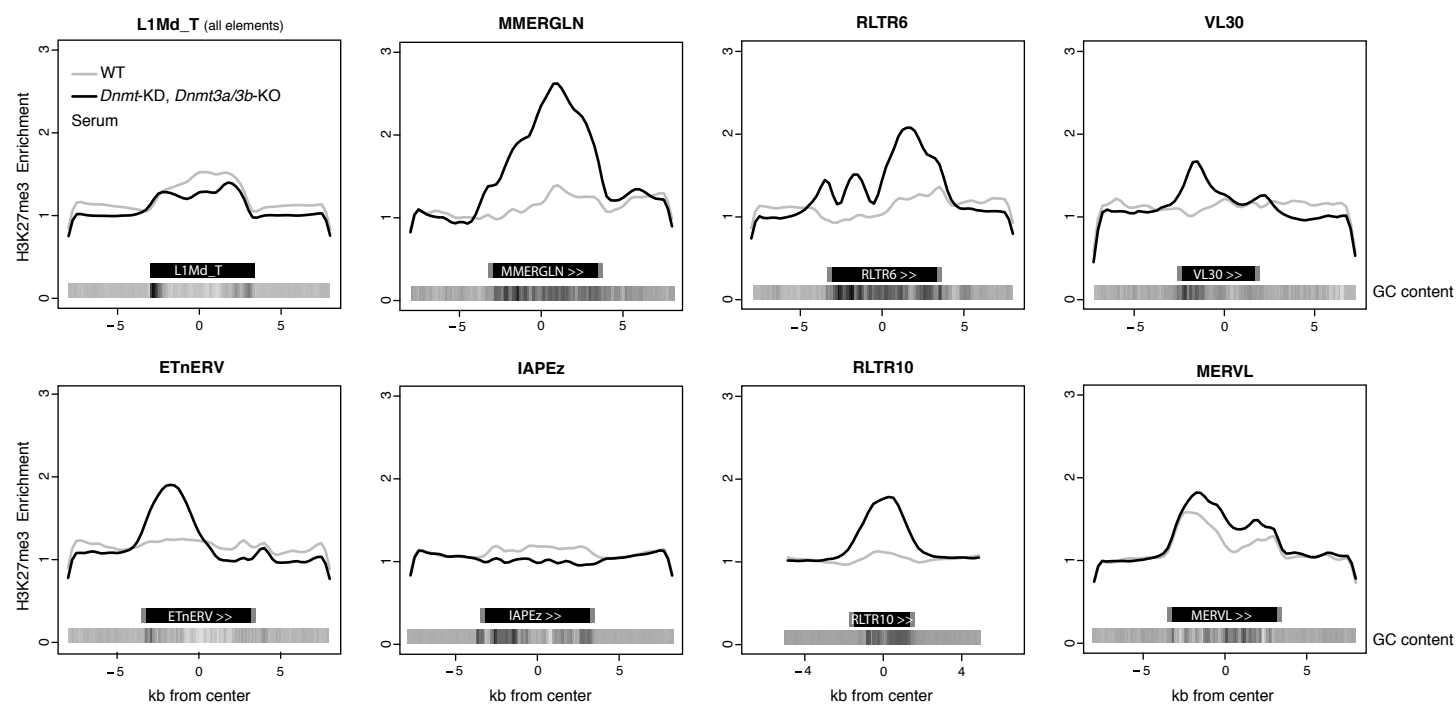

Supplement: supp [file elife-11418-supp-v1.zip]
