# Supplementary material for: An epigenetic switch ensures transposon repression upon dynamic loss of DNA methylation in embryonic stem cells
Source: eLife. 2016 Jan 27;5:e11418. doi: 10.7554/eLife.11418 (PMC4769179; doi:10.7554/eLife.11418)
Supplement: Supplementary file 1. — DOI: http://dx.doi.org/10.7554/eLife.11418.025 [file elife-11418-supp1.xlsx]

## Sheet: RNA
#Tool:tophat_2.0.6
#Method:Global alignment - No mismatch in seed alignment (of size 22), 3 mismatches in read length
#Algorithm used: Keep uniques best hits - Library type: fr-firststrand
#Targeted region:Only alignments >= MQ20 and reads that are NOT marked as duplicates are considered
#Sample identifier	Biological identifier	Number of total reads	Number of mapped reads	% of mapped reads
B99T1	J1 D0	213459951	151096208	0.7078
B99T2	J1 D6	210340434	142149513	0.6758
B99T3	J1 D13	204453602	139059777	0.6802
B99T4	J1 D0	230009813	159157855	0.692
B99T5	J1 D6	229534739	156779528	0.683
B99T6	J1 D13	216338499	138319471	0.6394
List of 156 Refseq genes significantly upregulated between D0 and D6 and without significant differences between D0 and D13
Cttnbp2
Gpr160
Lrrn2
Mep1b
Prss35
Rnf135
Shf
Smyd1
Tmem181b-ps
Trim43a
Zfhx2
Zfp951
Ablim1
Agpat2
AI427809
Ak7
Anapc10
Ankrd45
Axin2
Baz2b
Bcl2l14
Bcl3
C030039L03Rik
Capn6
Capsl
Casp8
Catip
Cbr3
Cep57l1
Clca4
Clcnka
Cntn1
Cobl
Coro6
Crisp1
Cyp2c55
Cyp4a30b
Cyp7b1
Cysltr2
D130040H23Rik
D1Pas1
D230025D16Rik
Dact2
Dnajc6
Dsg2
Duox1
Ehhadh
Eif2s2
Elf3
Eng
Epha4
Fam102a
Fdft1
Fgf10
Flrt2
Fry
Fut10
Gbgt1
Gbp9
Gm3604
Grsf1
Grtp1
H2-M5
Hap1
Herc3
Hes1
Ifi35
Ifitm7
Igsf23
Irak4
Jam2
Kank2
Kcnh3
Kcns3
Klf4
Klf8
Klhl22
Klhl42
Lap3
Lax1
Ldlr
Lmo7
Mblac2
Mcf2
Mex3b
Mgat5
Mpeg1
Mpp1
Mppe1
Mpv17l
Msc
Myo1f
Myof
Nanog
Nanos3
Nfix
Nim1k
Nkx6-2
Nlrp4g
Nod1
Noxo1
Npr3
Omp
Pabpc6
Pcsk1
Pex3
Phf11a
Pip5k1b
Pla2g4e
Plscr1
Podn
Popdc3
Ppargc1b
Ptgfrn
Rab39
Rcsd1
Relb
Rnf125
Rnf144b
Rpgrip1
Rtn4rl1
Sema5b
Sema6c
Sesn1
Sh3tc1
Siah2
Slc15a1
Slc16a14
Slfn9
Smad3
Sobp
Spint1
Src
Sync
Tbx15
Tfeb
Tmem181c-ps
Tnrc18
Tob1
Triml1
Trp53cor1
Tspan1
Ttll6
Ttn
Tubb2b
Ube2dnl1
Ugdh
Ulk1
Xirp2
Zeb1
Zfp78
Zp3
1700030C10Rik
1700084C01Rik
4930452B06Rik
4930519F16Rik

## Sheet: WGBS
The first eight base pairs of the reads were trimmed using FASTX-Toolkit v0.0.13
Adapter sequences were removed with Cutadapt v1.3 and reads shorter than 16pb were discarded.
Cleaned sequences were aligned to the mouse genome (mm10) Using Bismark v0.12.5 and default parameters
Only reads mapping uniquely on the genome were conserved. Methylation calls were extracted after duplicates removal. Only CG dinucleotides covered by a minimum of 10 reads were conserved for the rest of the analysis.
#Sample identifier	Biological identifier	Number of total sequenced tags	Number of cleaned sequenced tags	Number of paired-end alignments with a unique best hit	Mapping efficiency	Total count of deduplicated leftover sequences	C methylated in CpG context	C methylated in CHG context	C methylated in CHH context	%CpGs covered by at least 1x	% covered by at least 5x	% covered by at least 10x	GEO number	Publication
ERR192357	J1 Serum	242714563	241941728	108882056	45.0034	86908726	77.1	2.2	2.3	72.2268	31.0854	6.95032	ERP001953	Seisengerber et al., 2012
GSM1027571	E14 Serum	467149751	466901697	316209649	67.7251	273132665	71.3	0.7	0.6	81.7756	63.4471	47.257	GSE41923	Habibi et al., 2013
GSM1027572	E14 2i	466450045	465957183	301890930	64.7894	255104546	30.3	0.1	0.2	80.9336	61.7685	44.8344	GSE41923	Habibi et al., 2013
A274-B113T1	J1 2i+vitC	447494671	447404318	270945884	60.5595	190029868	4.6	0.7	0.8	81.1435	55.3761	33.4571		from this study

## Sheet: ChIP
#Tool: Bowtie 1.0.0
#3 mismatches
#Algorithm used: Report randomly one best hit per read
#Sample identifier	Biological identifier	Number of total reads	Number of mapped reads	% of mapped reads	% of duplicates
A291-A292C1	Input_K9-1	75468914	69370052	0.919187	0.0787
A291-A292C2	ChIP_K9-1_D0	79172270	69473090	0.877493	0.2051
A291-A292C3	ChIP_K9-1_D6	84177608	73522216	0.873418	0.2632
A291-A292C4	ChIP_K9-1_D15	75428406	66968060	0.887836	0.1782
A291-A292C5	Input_K9-2	83496606	75945018	0.909558	0.1037
A291-A292C6	ChIP_K9-2_D0	75060252	65940744	0.878504	0.2019
A291-A292C7	ChIP_K9-2_D6	87029208	76798684	0.882447	0.223
A291-A292C8	ChIP_K9-2_D15	85637102	75413994	0.880623	0.2367
A291-A292C9	Input_K27-1	86256562	78822332	0.913813	0.0987
A291-A292C10	ChIP_K27-1_D0	82339150	75835212	0.92101	0.0719
A291-A292C11	ChIP_K27-1_D6	89508604	82104576	0.917281	0.0761
A291-A292C12	ChIP_K27-1_D15	87891782	79856614	0.908579	0.1095
A291-A292C13	Input_K27-2	79127682	72111116	0.911326	0.0994
A291-A292C14	ChIP_K27-2_D0	69144980	63468582	0.917906	0.073
A291-A292C15	ChIP_K27-2_D6	67961062	62111844	0.913933	0.0661
A291-A292C16	ChIP_K27-2_D15	70720000	63983318	0.904741	0.082
