# Supplementary figures and images for: An epigenetic switch ensures transposon repression upon dynamic loss of DNA methylation in embryonic stem cells
Source: eLife journal article supplement (doi:10.7554/elife.11418), 2016-01-27

**A**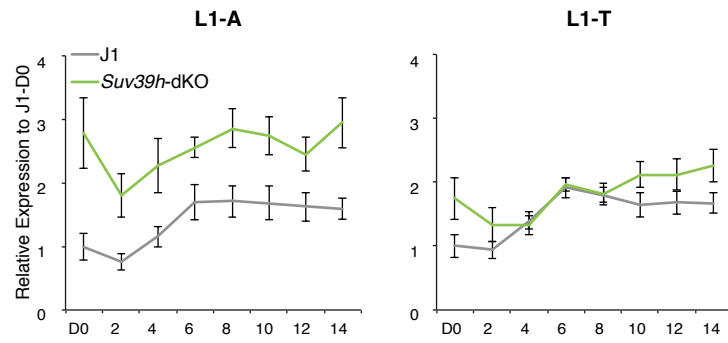**B**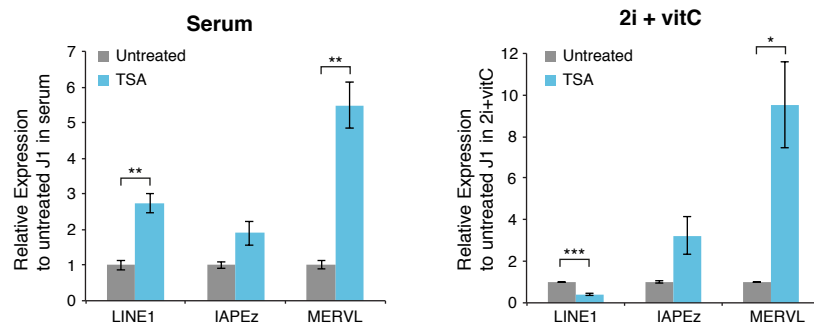

Supplement: supp [file elife-11418-supp-v1.zip]

**A**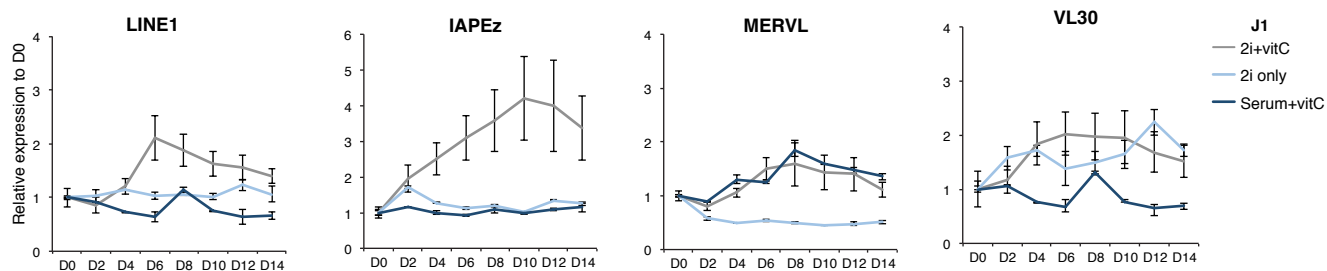**B**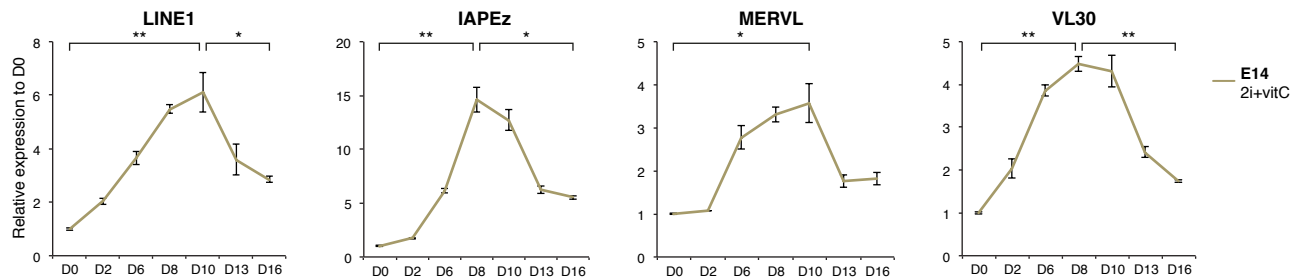**C**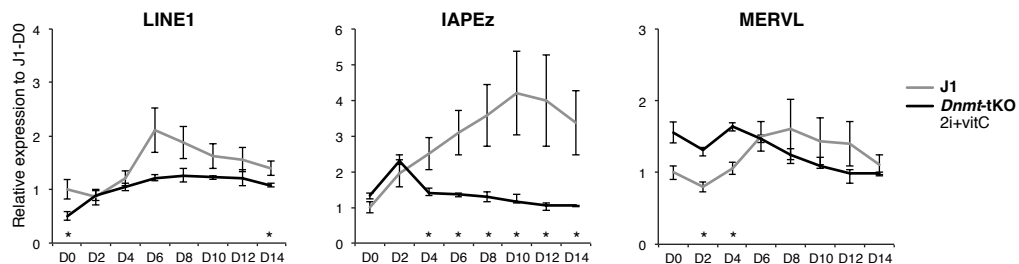

Supplement: supp [file elife-11418-supp-v1.zip]

**A**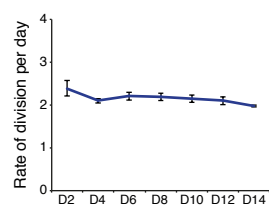**B**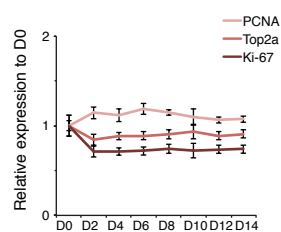**C**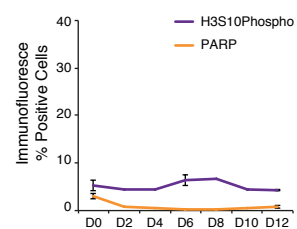**D**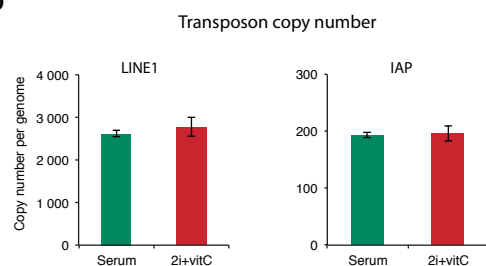**E**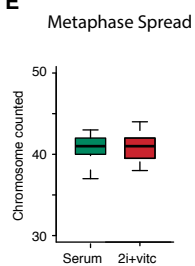

Supplement: supp [file elife-11418-supp-v1.zip]

**A**

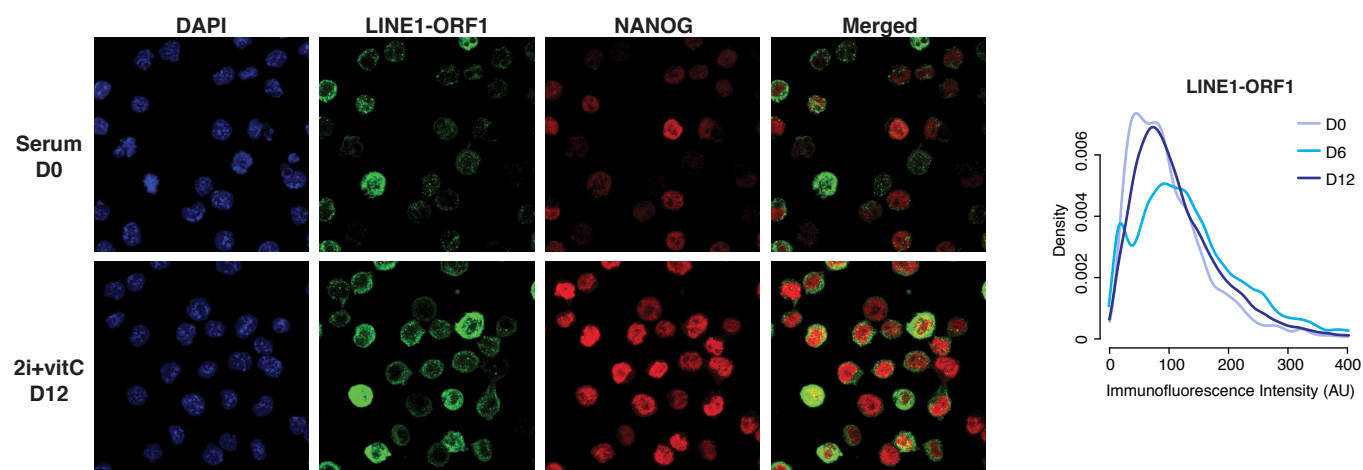

**B**

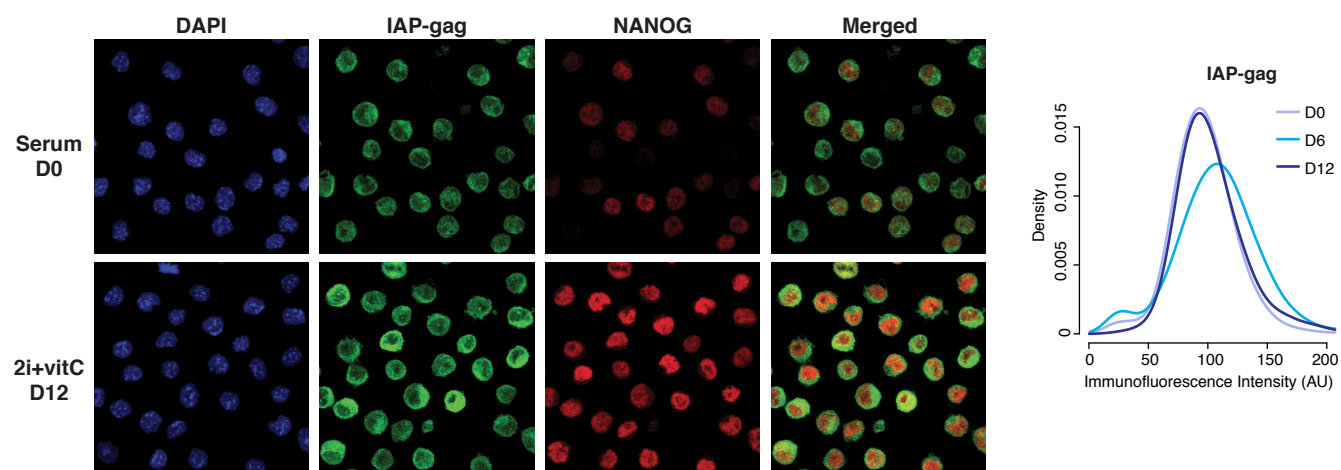

Supplement: supp [file elife-11418-supp-v1.zip]

**A**

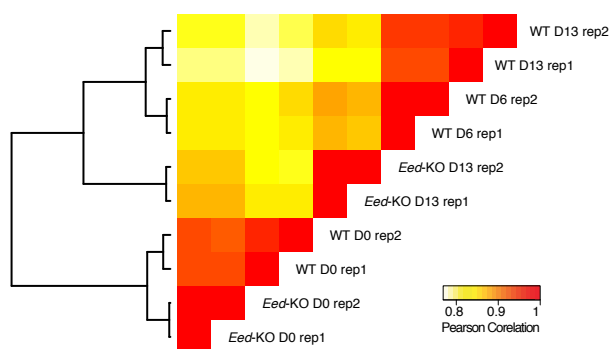

**B**

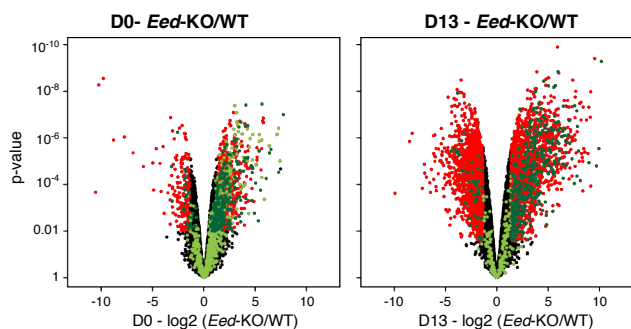

**C**

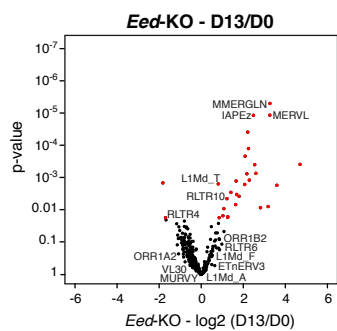

**D**

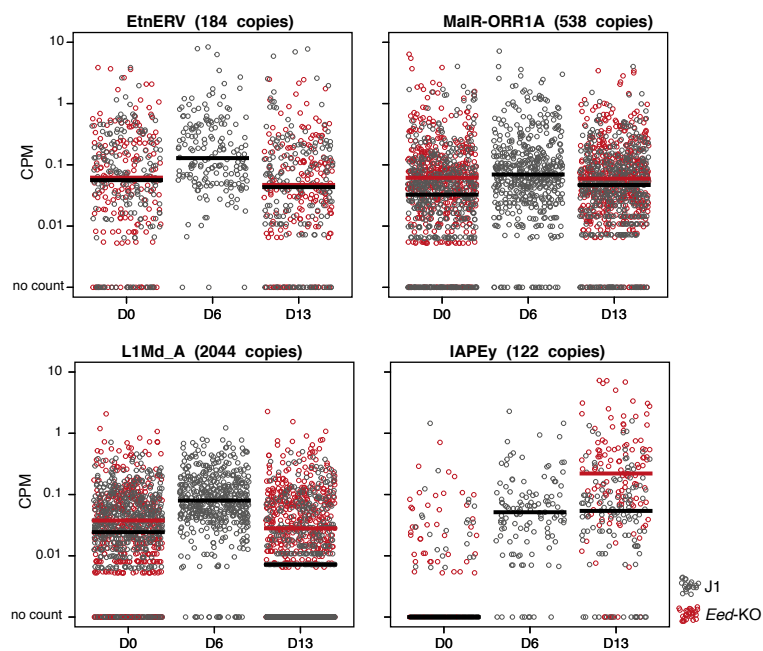

Supplement: supp [file elife-11418-supp-v1.zip]

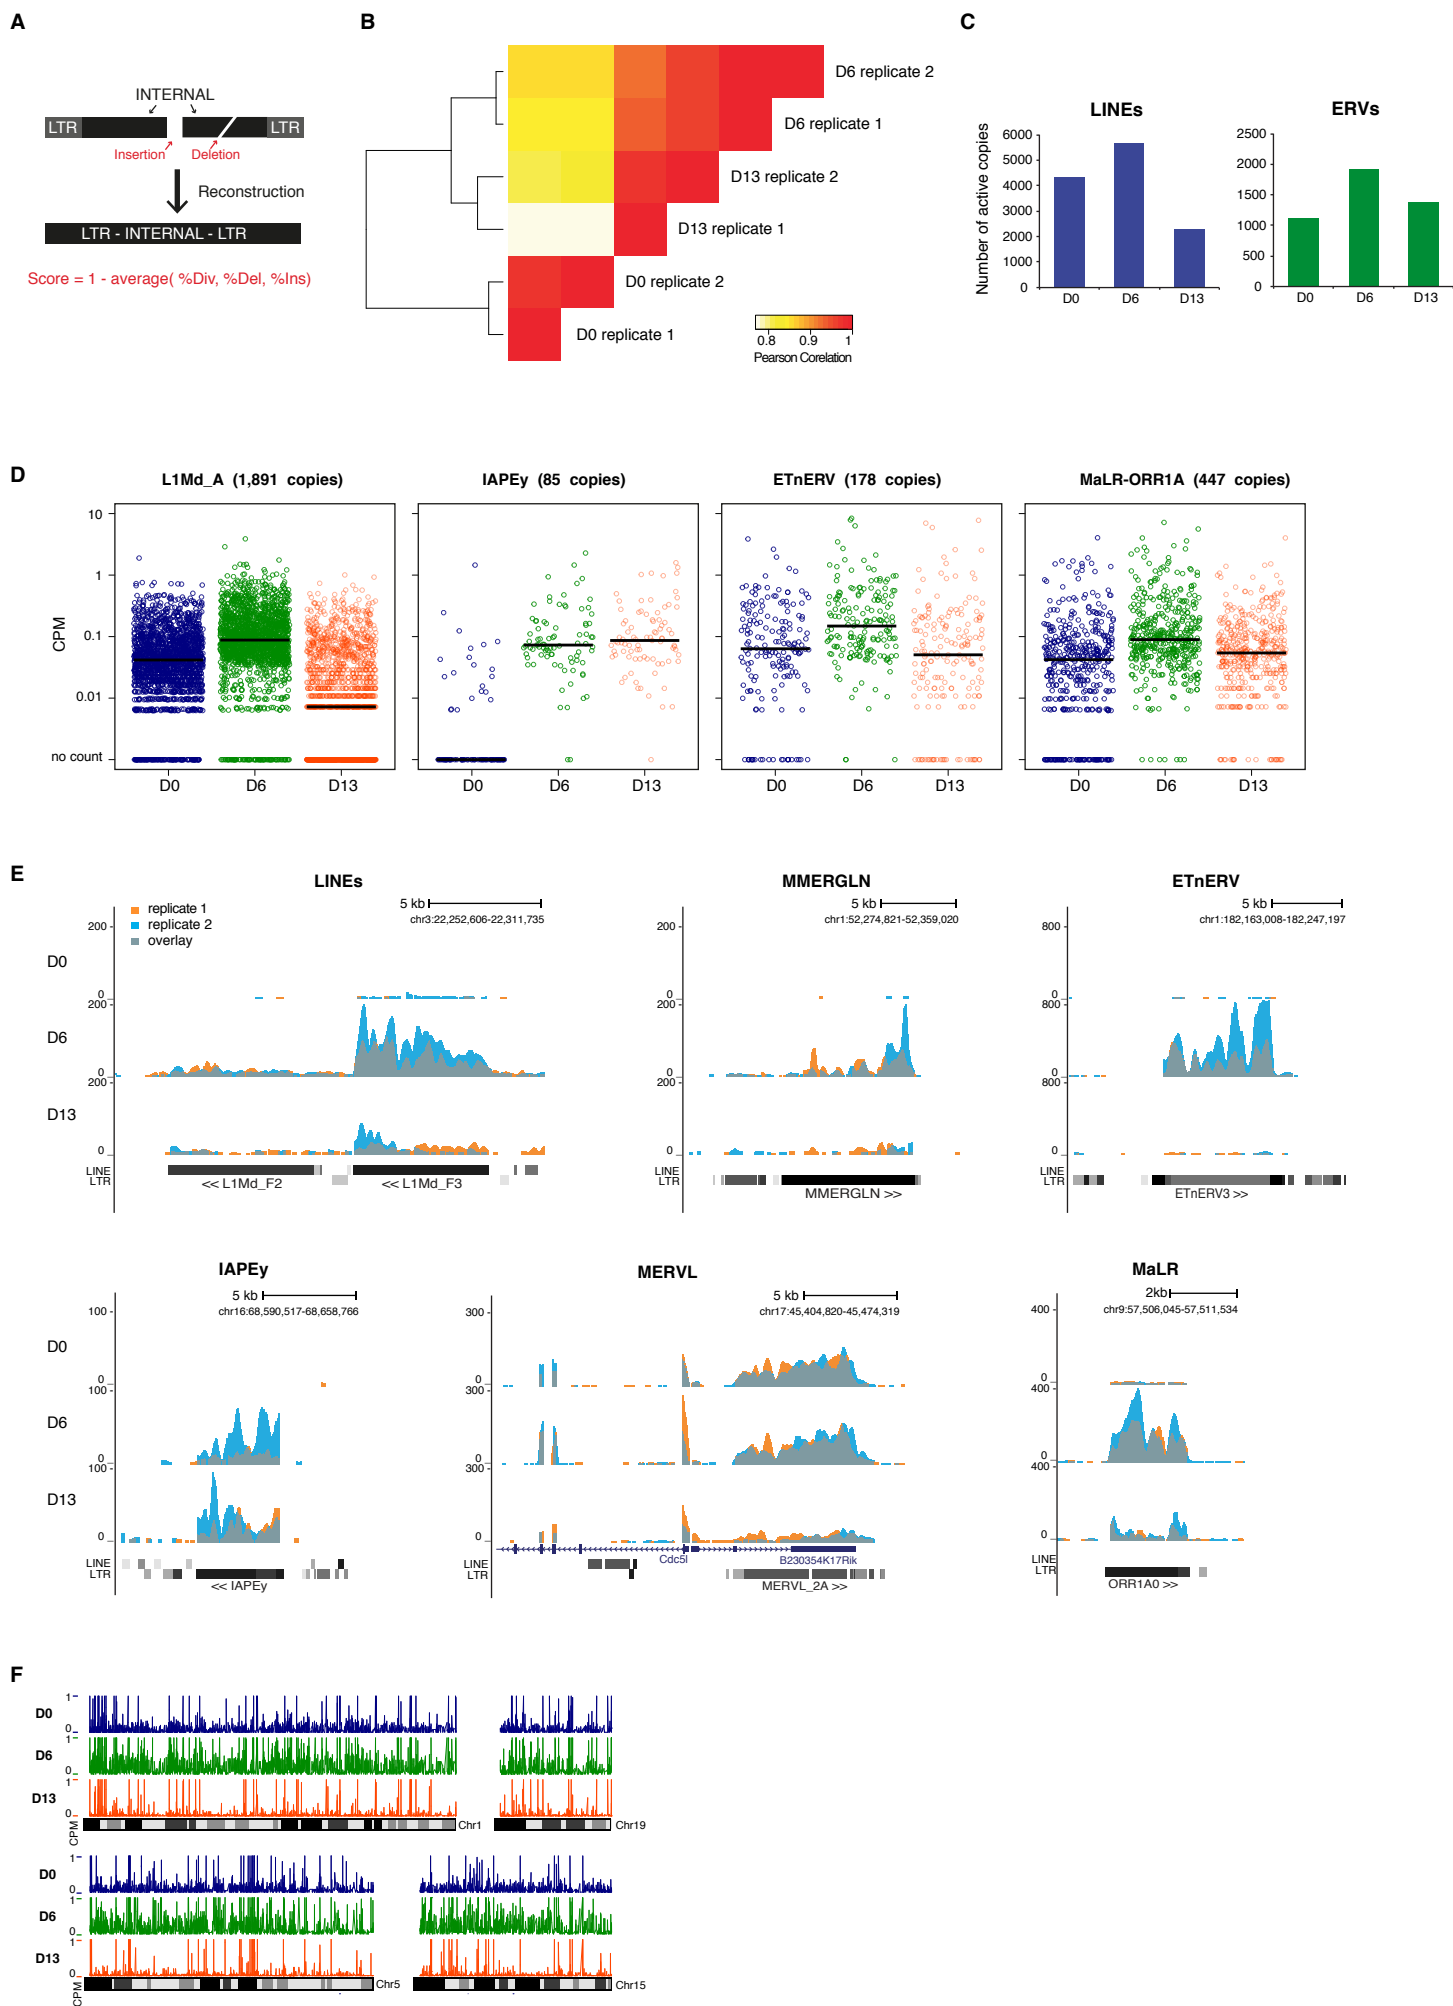

Supplement: supp [file elife-11418-supp-v1.zip]

**A**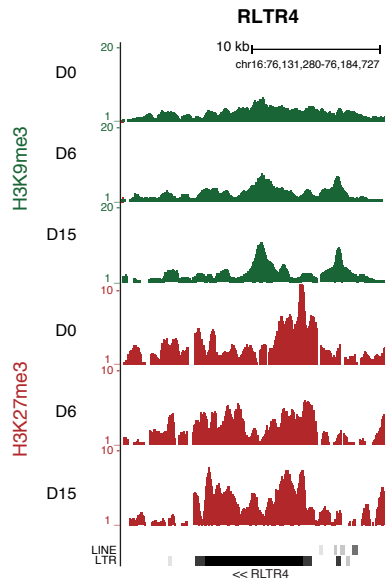**B**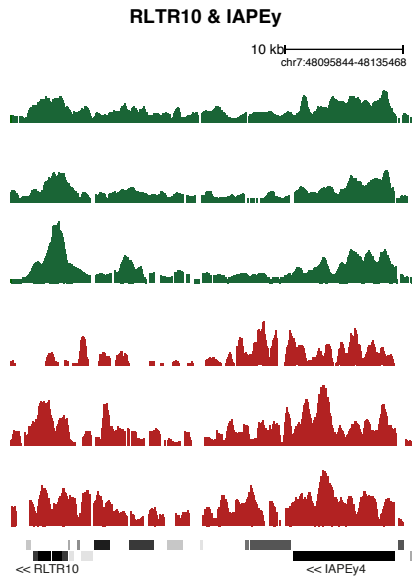**C**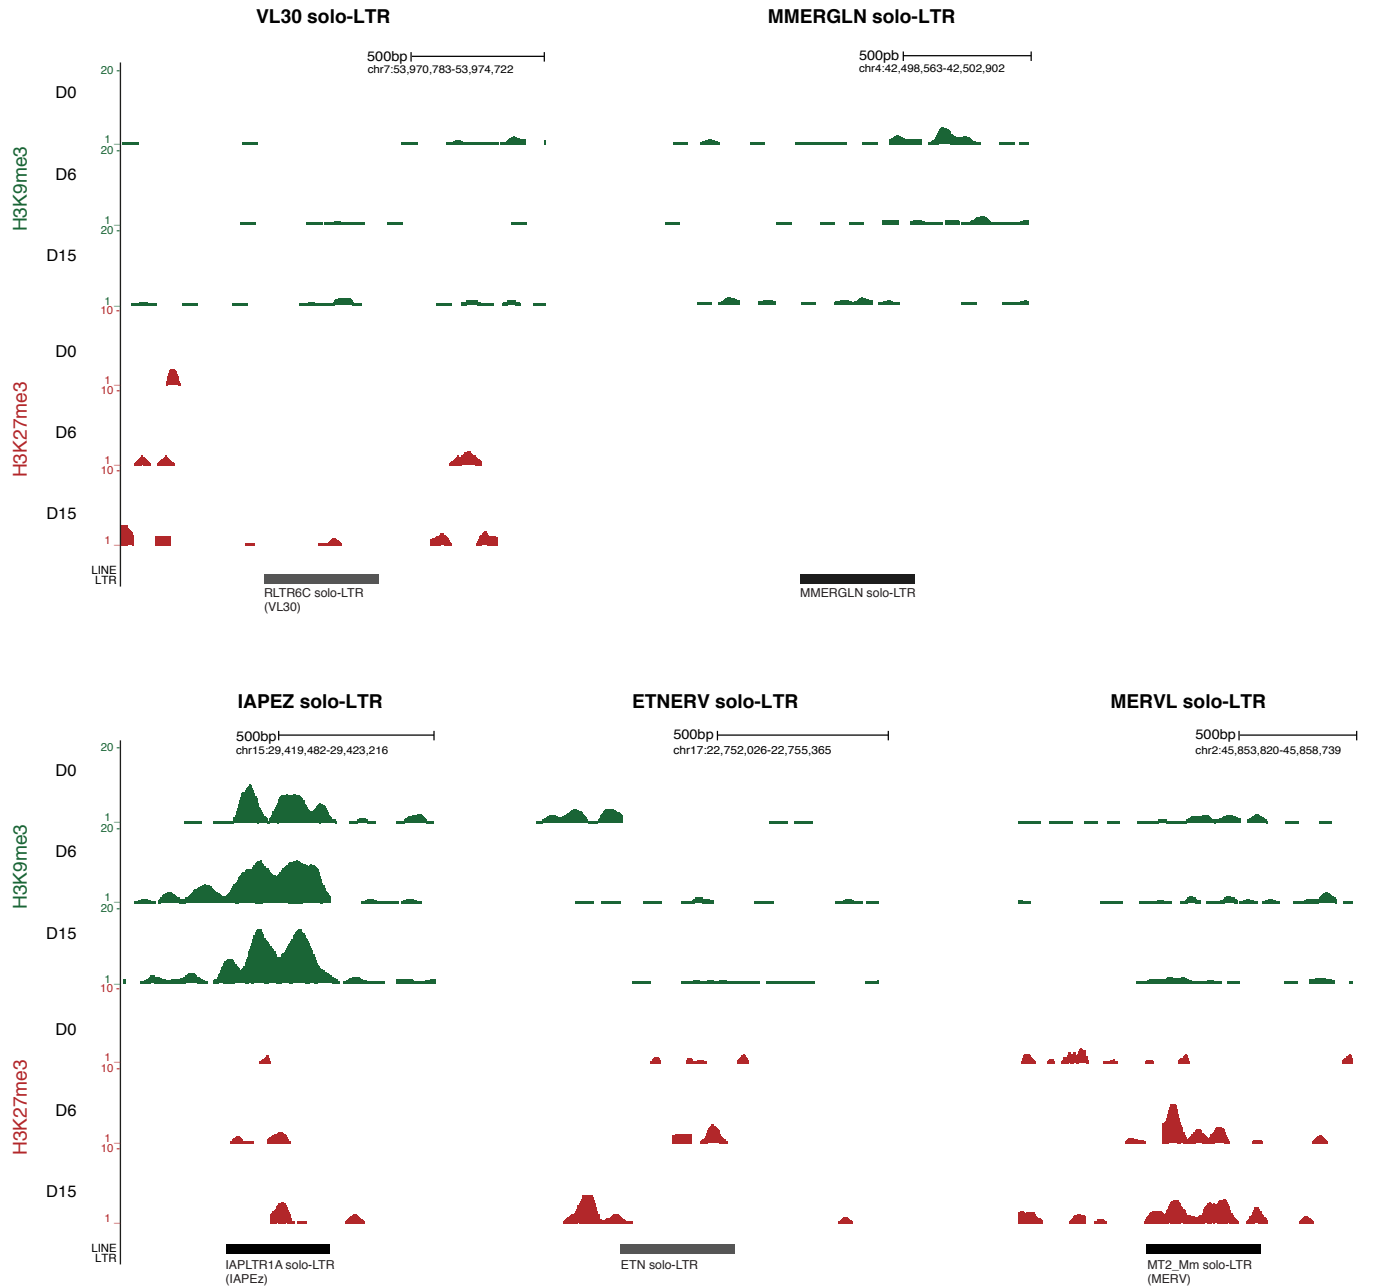

Supplement: supp [file elife-11418-supp-v1.zip]

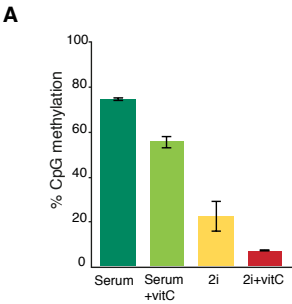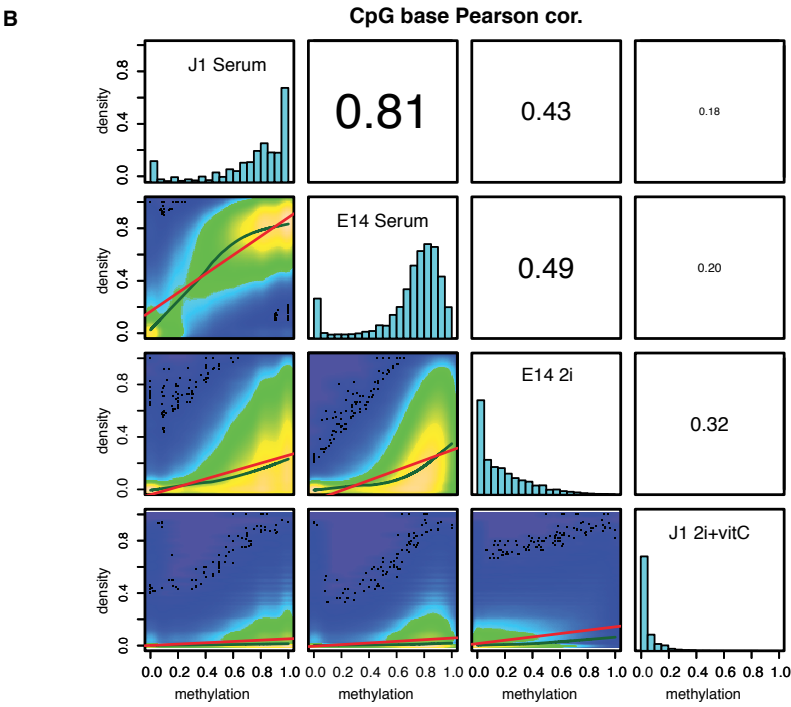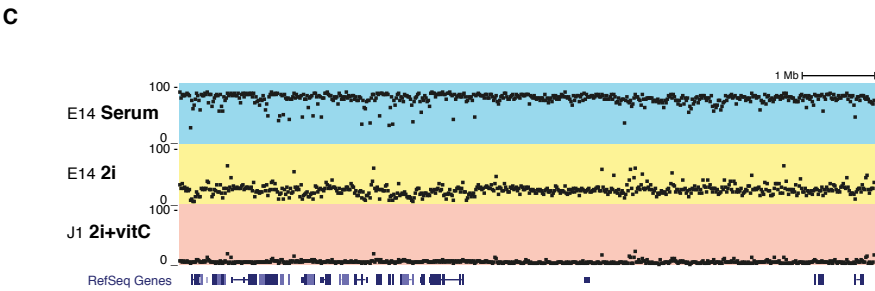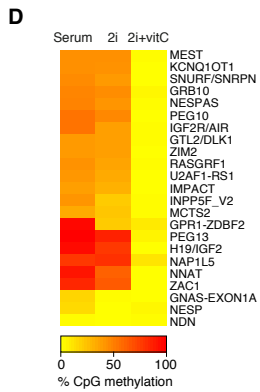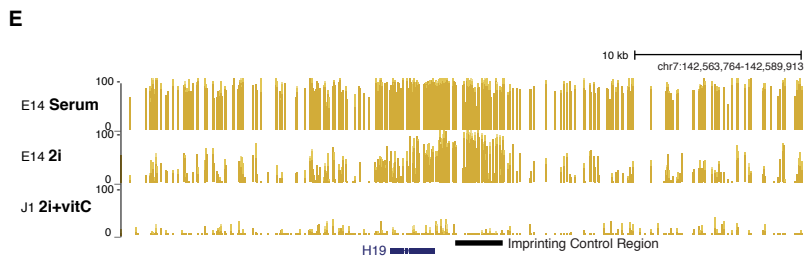

Supplement: supp [file elife-11418-supp-v1.zip]

**A***Suv39h*-dKO Serum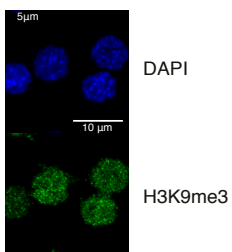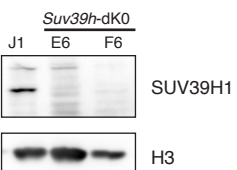**B**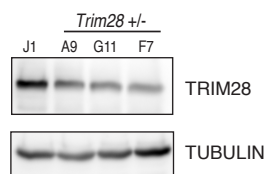**C**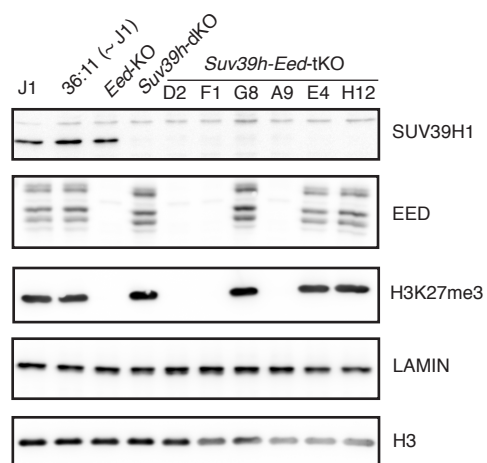

Supplement: supp [file elife-11418-supp-v1.zip]

A

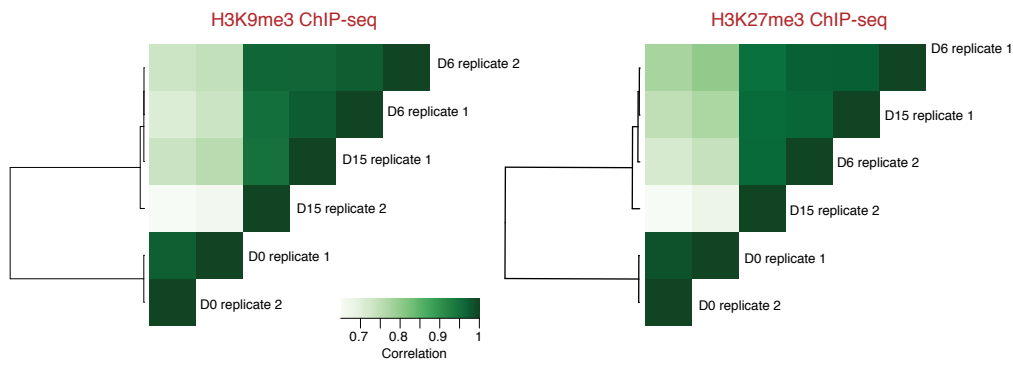

B

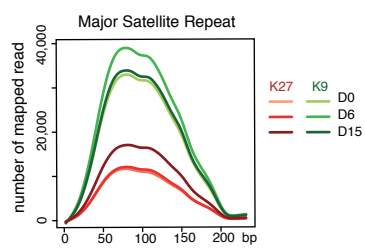

C

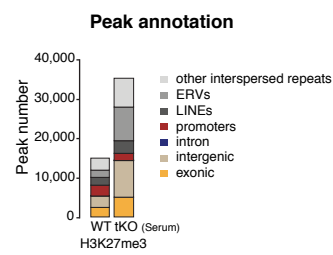

D

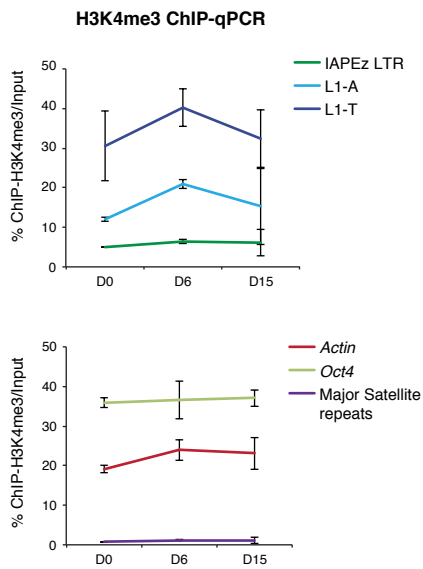

E

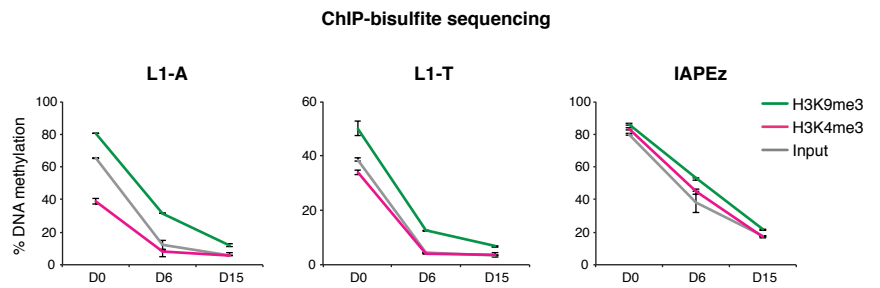

Supplement: supp [file elife-11418-supp-v1.zip]

**A**

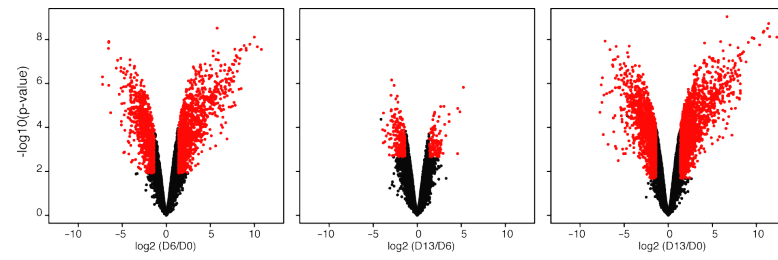

**B**

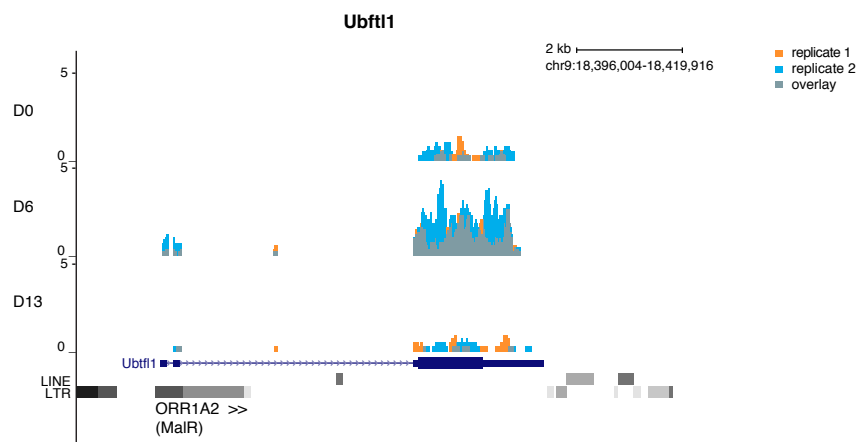

**C**

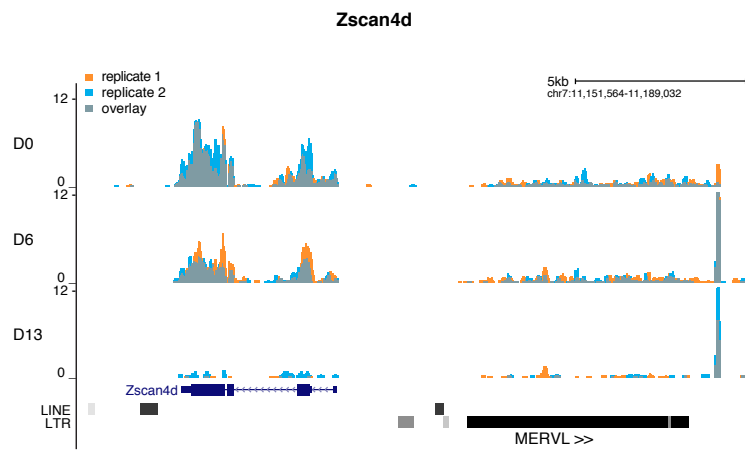

Supplement: supp [file elife-11418-supp-v1.zip]

**A**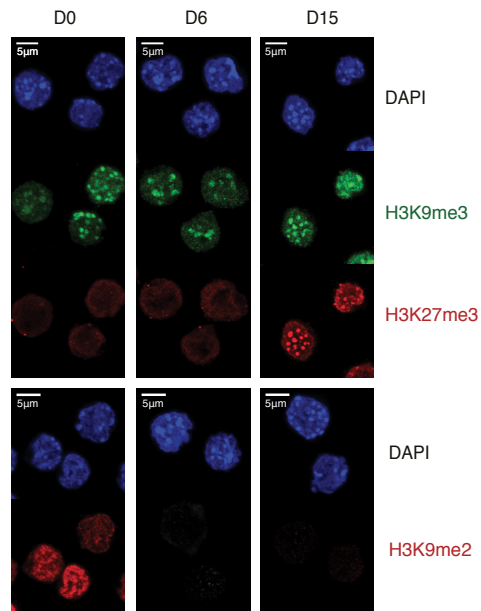**B**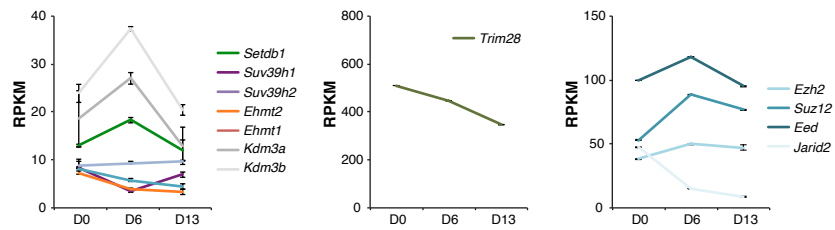**C**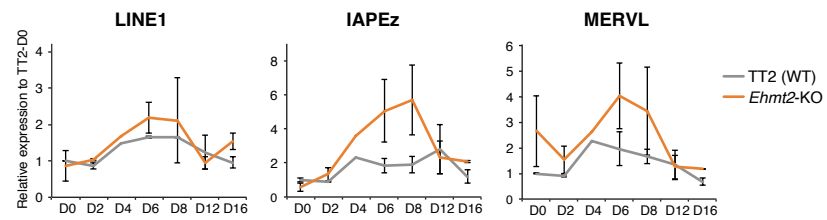

Supplement: supp [file elife-11418-supp-v1.zip]

**A**

**Category A**

Homogeneous

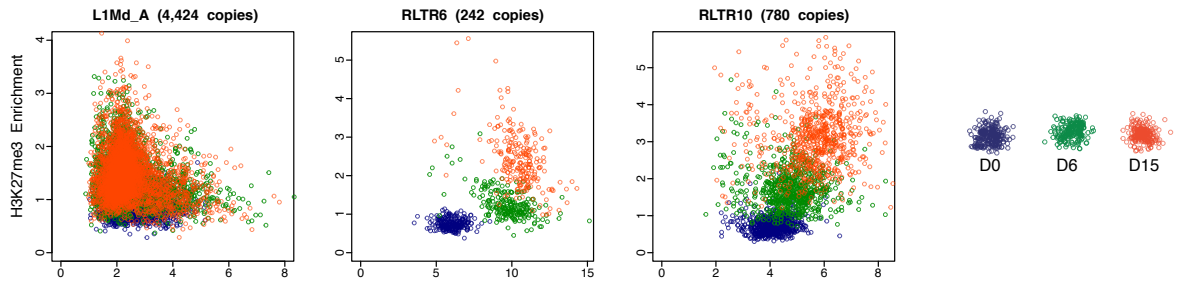

Heterogeneous

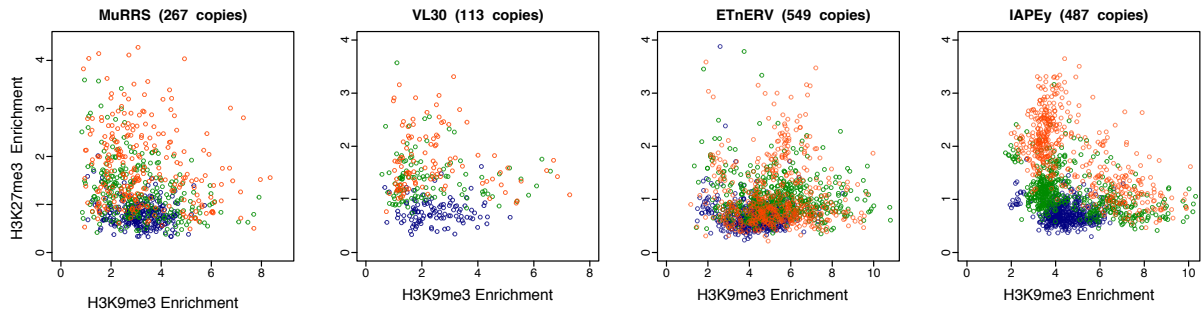

**B**

**Category B**

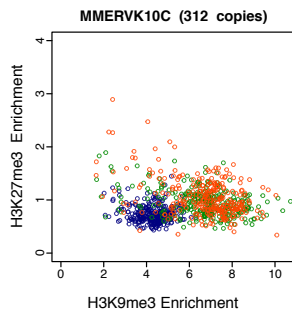

**C**

**Category C**

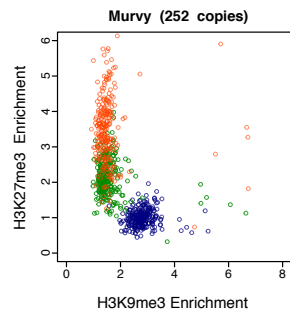

**D**

**Other** (enriched for H3K27me3 at D0)

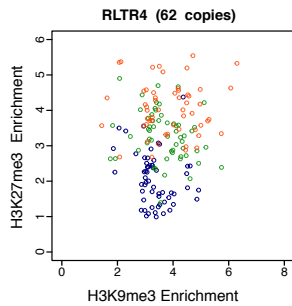

Supplement: supp [file elife-11418-supp-v1.zip]
